# Supplementary material for: Eutectic Formation of Naproxen with Some Dicarboxylic Acids
Source: MDPI journal article supplement (doi:10.3390/pharmaceutics13122081), 2021-12-04
Supplement: s1 [file s1]

Table S1. Raw data for the calculation of  $I_c$  values

| Type                       | Compound | MW<br>(g/mol) | $T_{fus}$<br>(K) | $\Delta H_{fus}$<br>(J/g) | $\Delta H_{fus}$<br>(kJ/mol) |
|----------------------------|----------|---------------|------------------|---------------------------|------------------------------|
| API                        | NPX      | 230.26        | 432.15           | 142.55                    | 32.824                       |
|                            | IBU      | 206.29        | 348.57           | 130.35                    | 26.889                       |
| Dicarboxylic acid          | SUC      | -             | 465.63           | -                         | -                            |
|                            | GLU      | -             | 371.73           | -                         | -                            |
|                            | SUB      | -             | 417.25           | -                         | -                            |
| Fatty alcohol <sup>1</sup> | TD       | -             | 313.15           | -                         | -                            |
|                            | OD       | -             | 333.65           | -                         | -                            |
|                            | DC       | -             | 346.98           | -                         | -                            |

<sup>1</sup> Tetradecanol (TD), octadecanol (OD), and docosanol (DC).

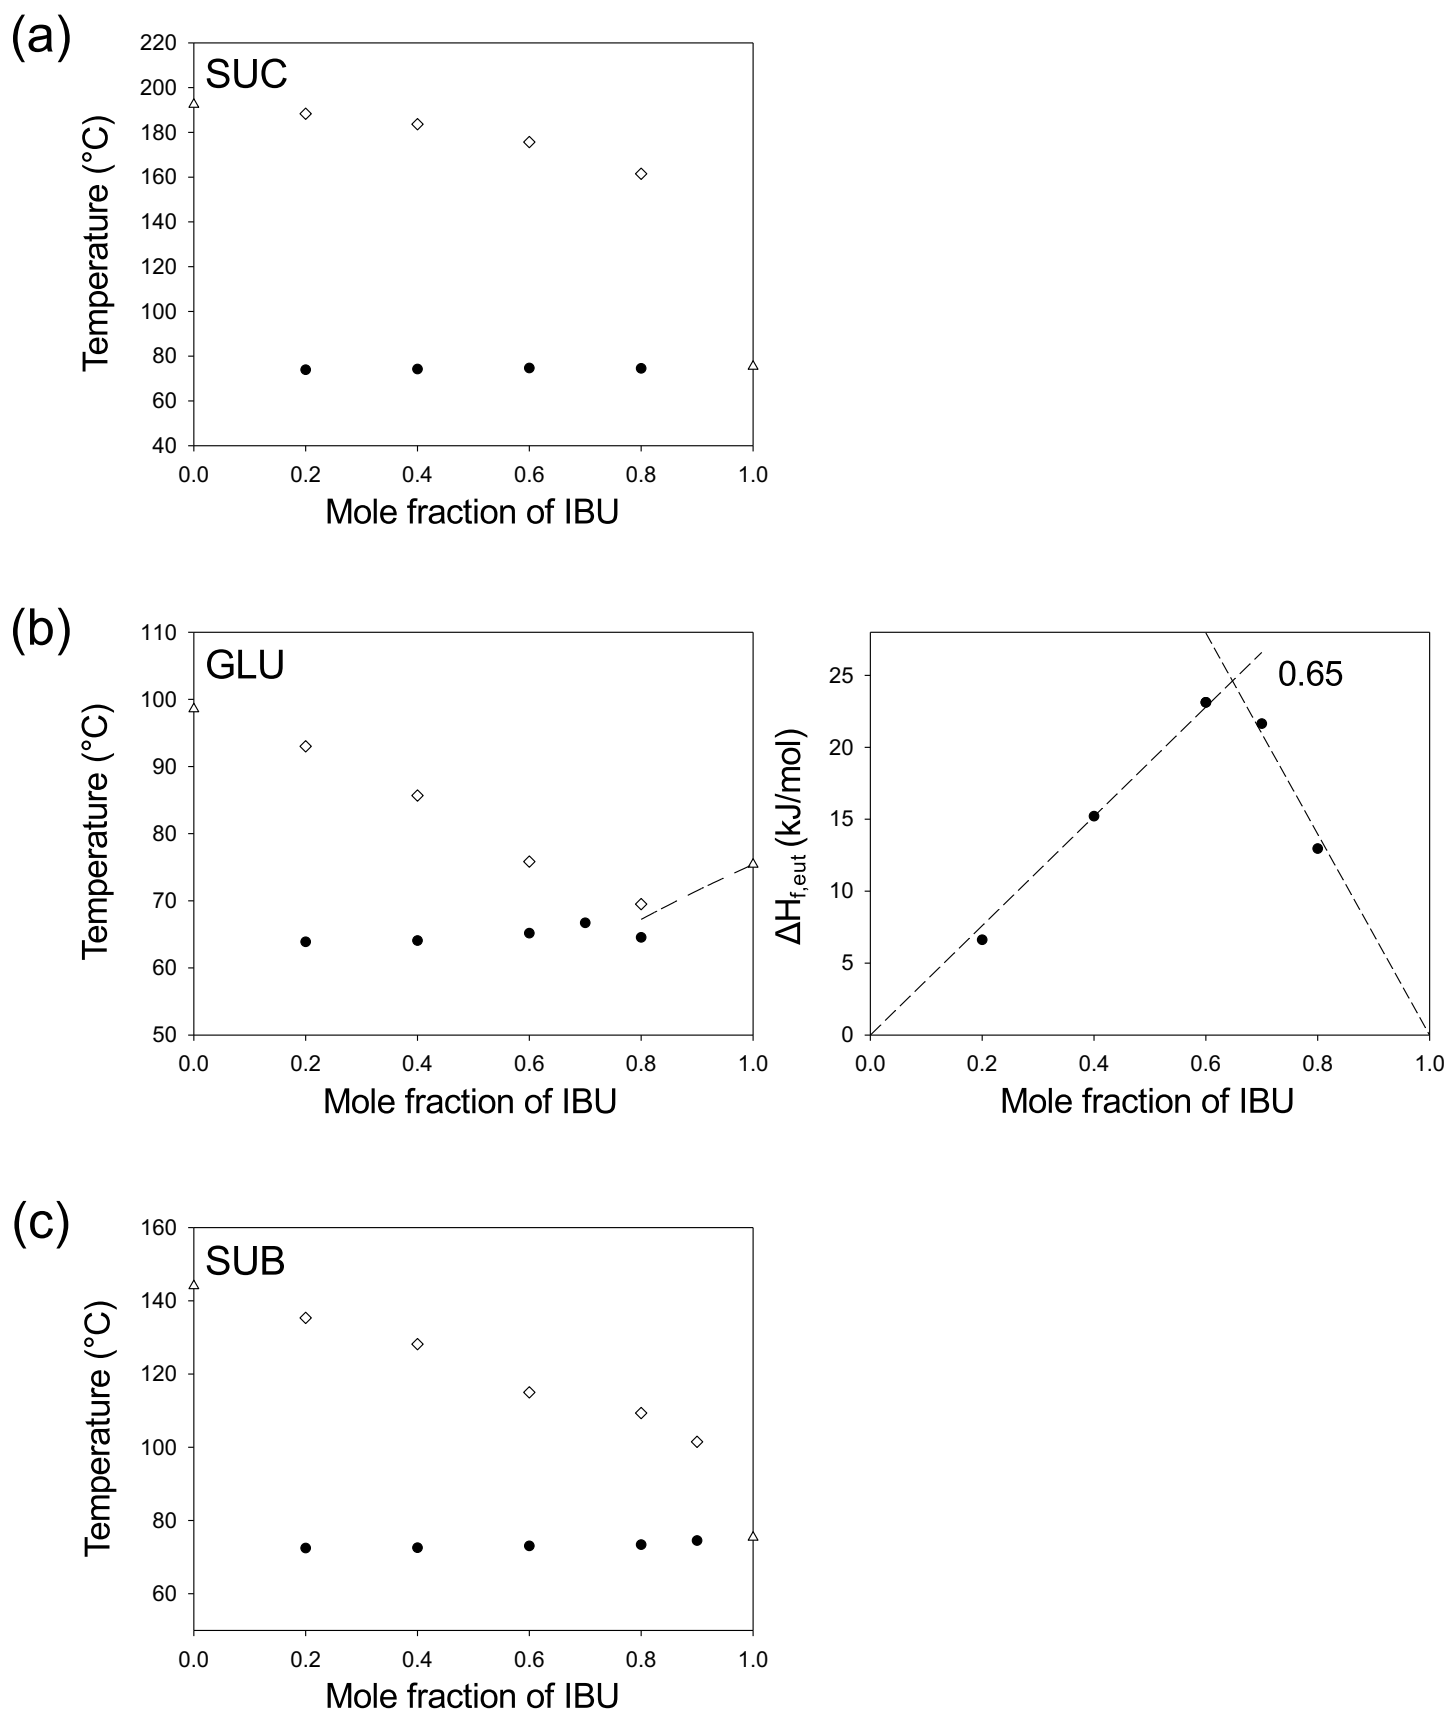

Figure S1. Melting diagrams of (a) IBU/SUC, (b) IBU/GLU (with Tammann plot), and (c) IBU/SUB mixtures.

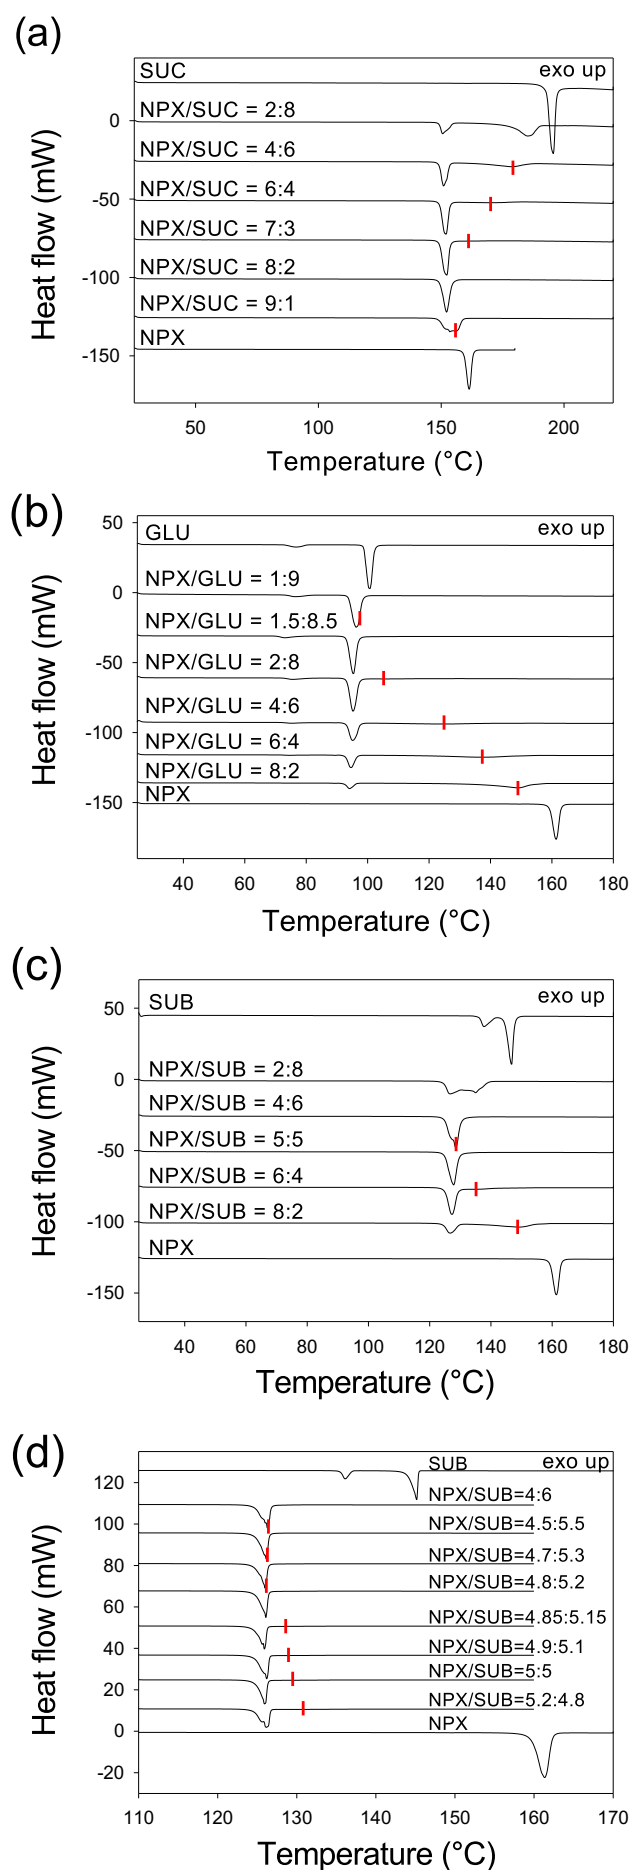

Figure S2. DSC thermograms of (a) NPX/SUC, (b) NPX/GLU, and (c, d) NPX/SUB mixtures. Heating rate 10 °C/min for (a, b, c) and 1 °C/min for (d).

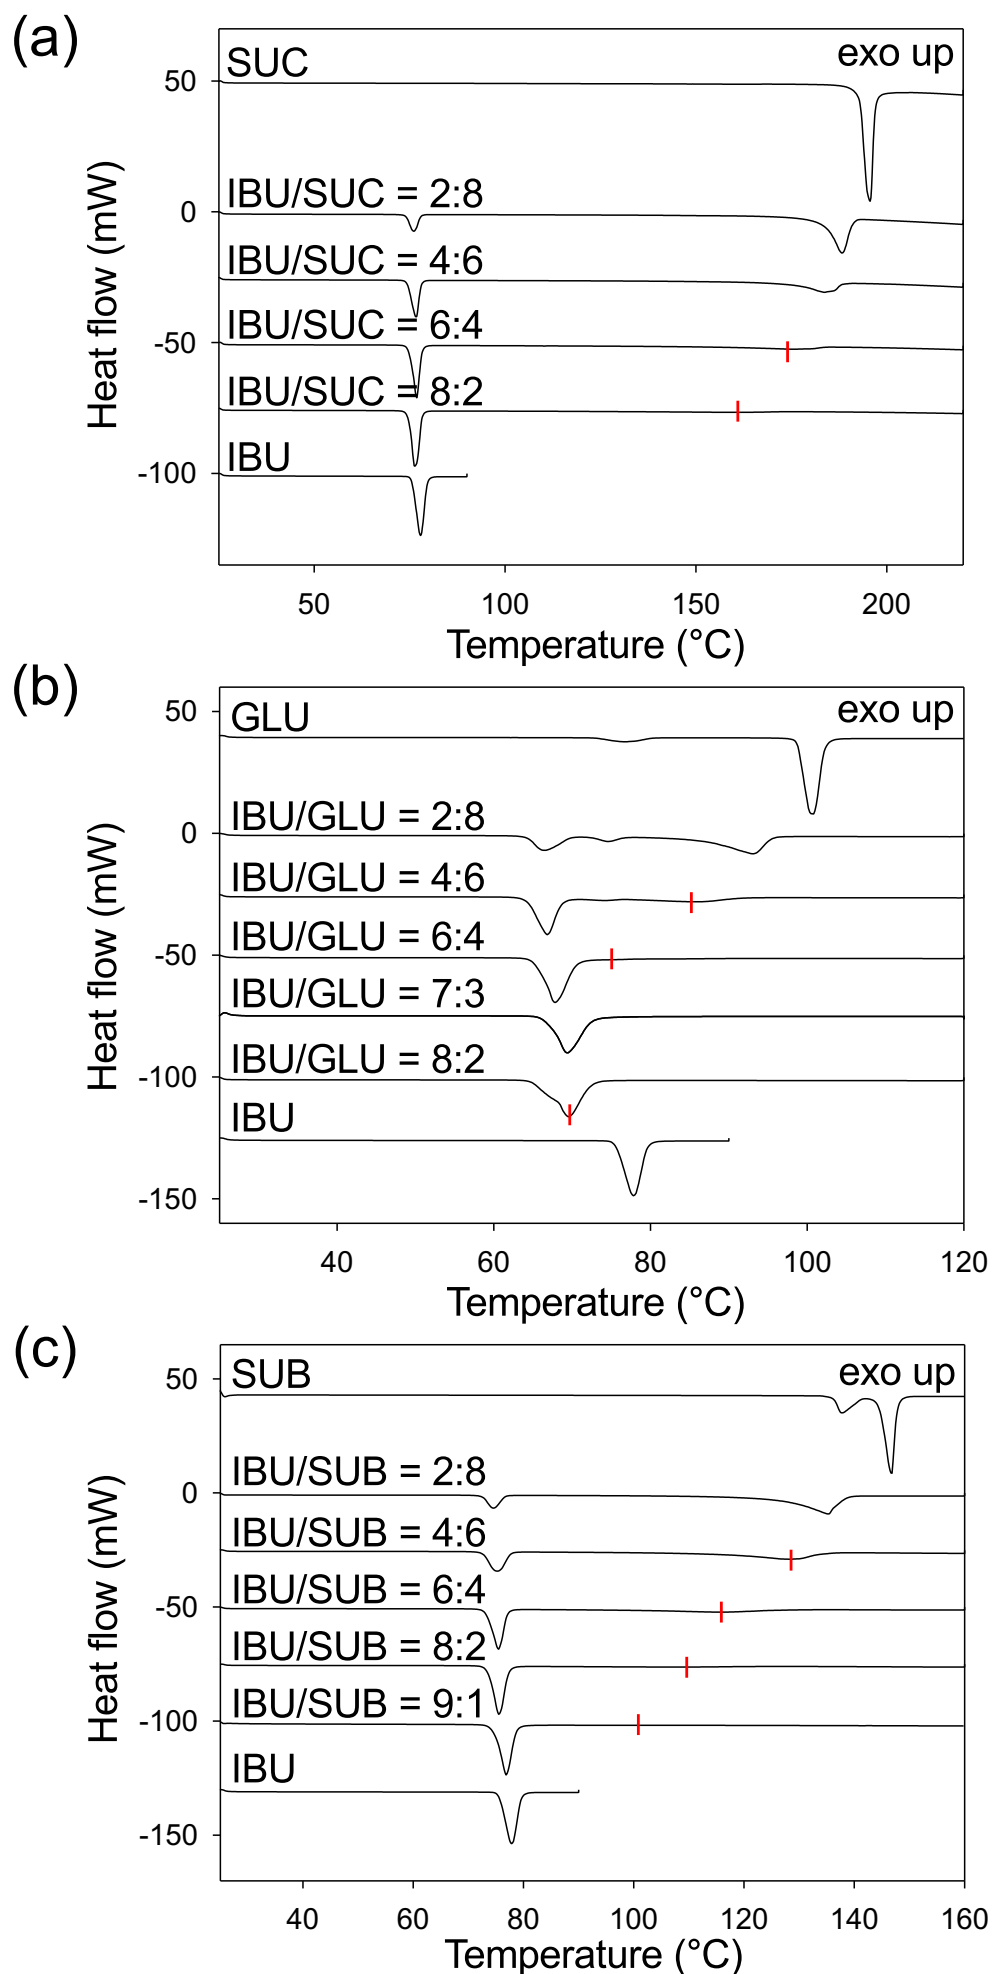

Figure S3. DSC thermograms of (a) IBU/SUC, (b) IBU/GLU, and (c) IBU/SUB mixtures. Heating rate 10 °C/min.

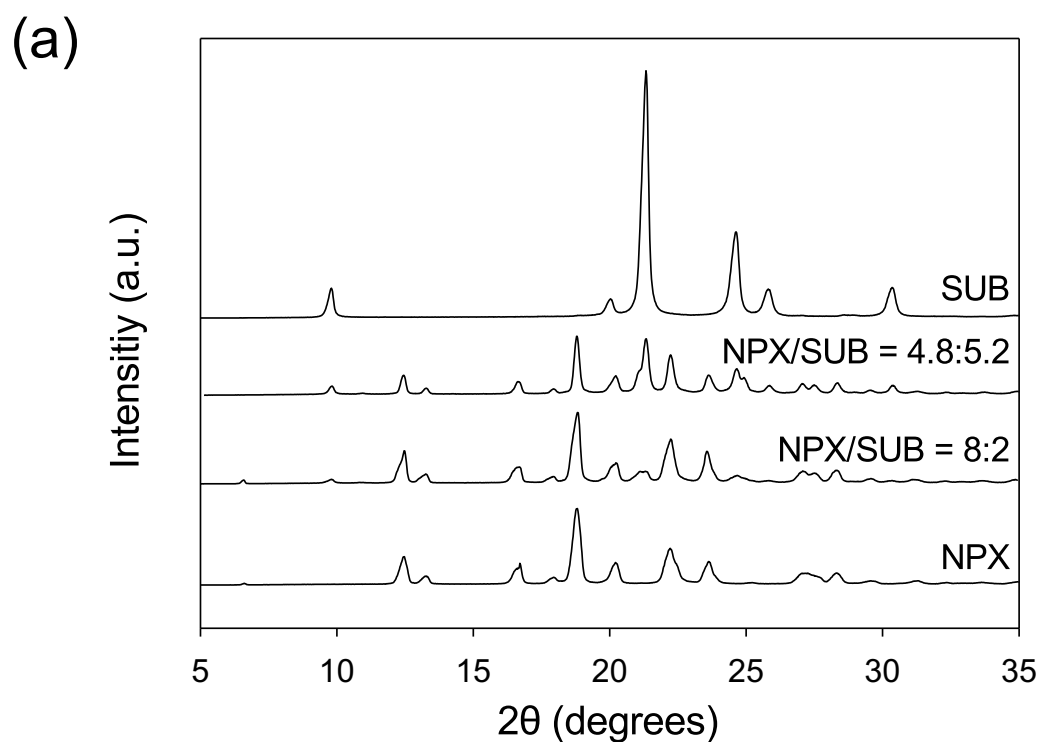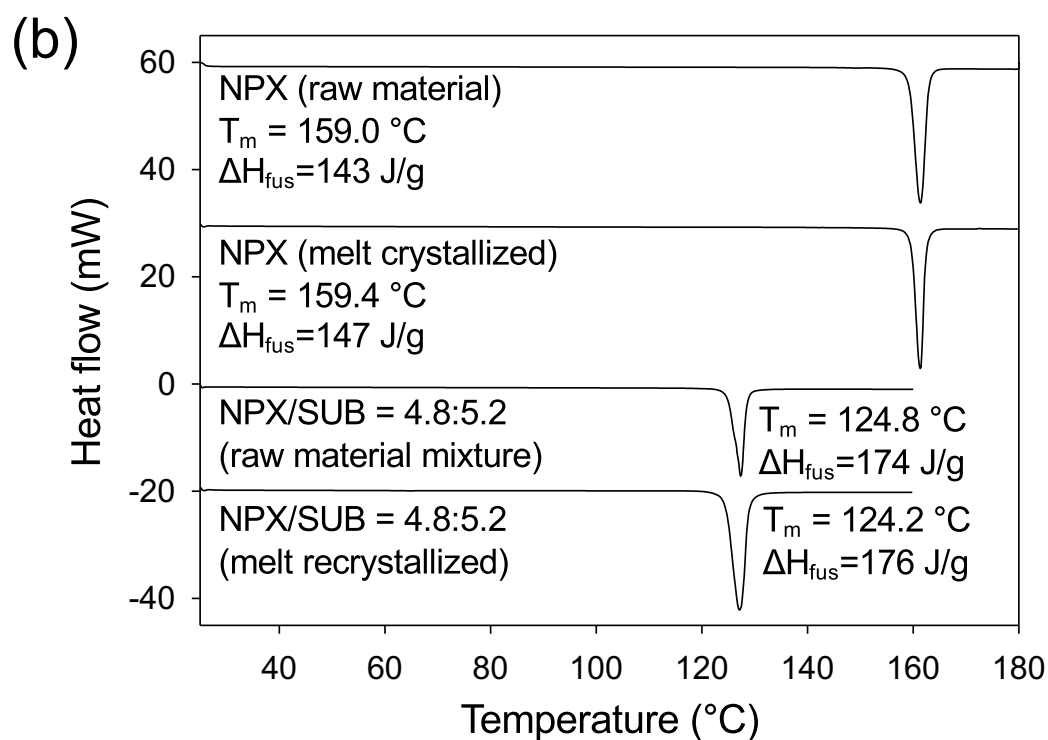

Figure S4. (a) XRD patterns for melt crystallized NPX, NPX/SUB, and SUB. (b) DSC thermograms to compare NPX and NPX/SUB before and after melt crystallization.

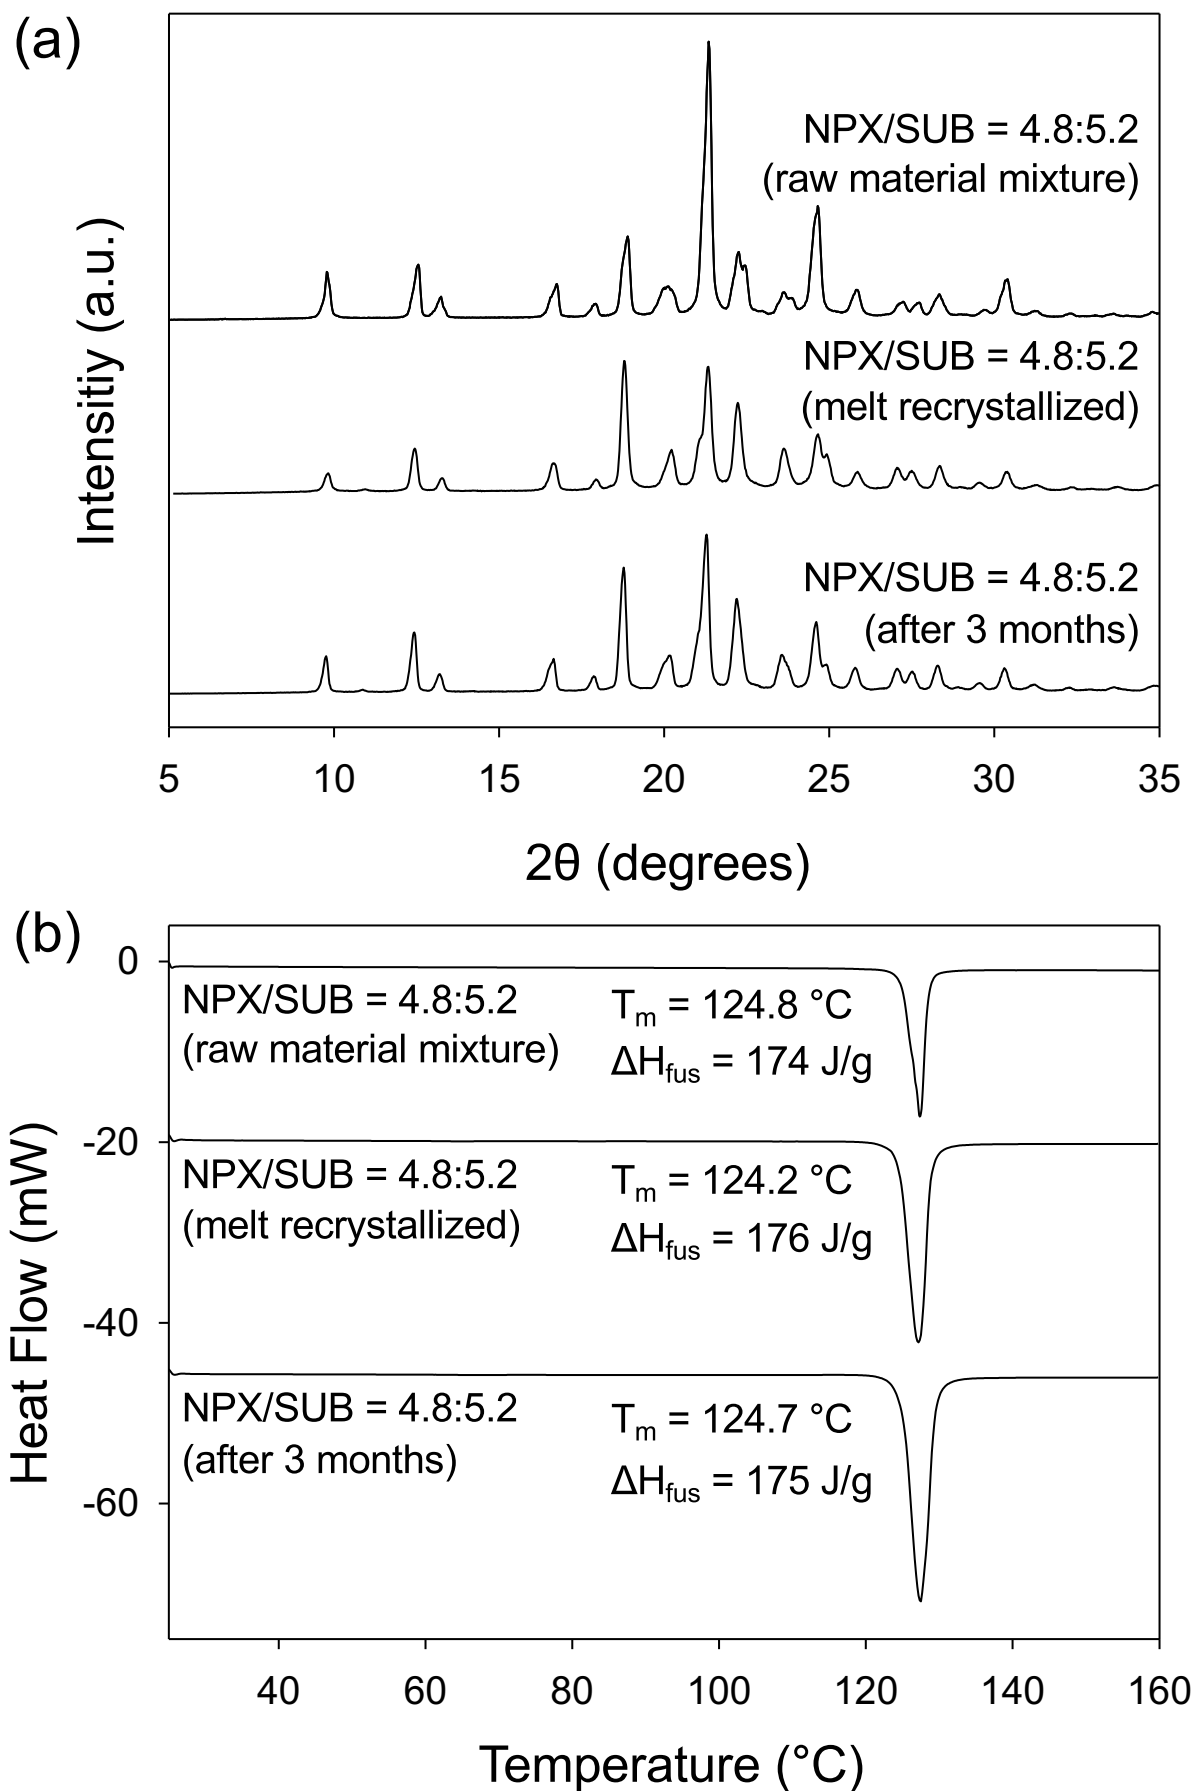

Figure S5. (a) XRD patterns and (b) DSC thermograms to show that virtually no change occurred for the 3-month storage (room temperature) after melt recrystallization.

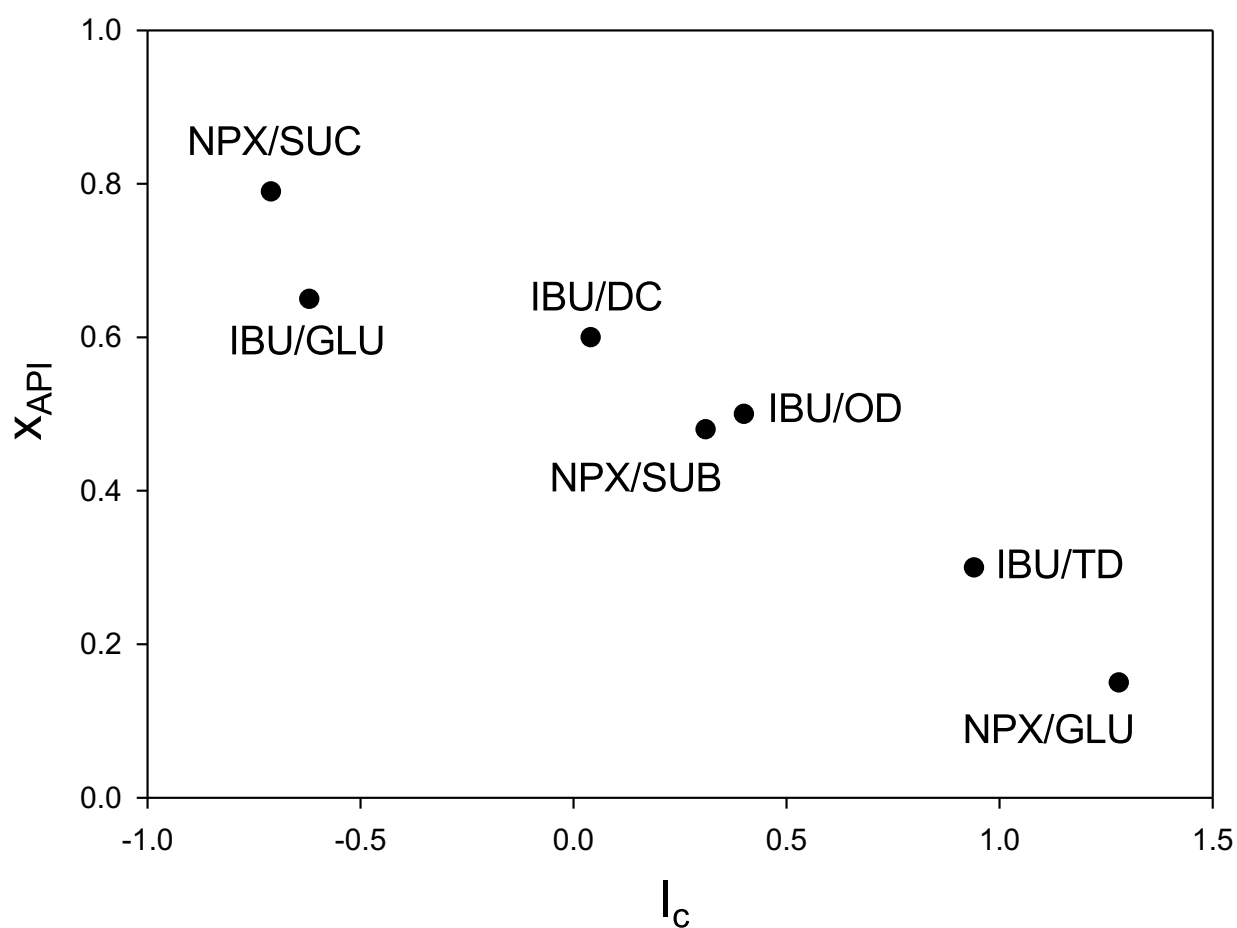

Figure S6. Correlation between  $I_c$  and the mole fraction of APIs ( $x_{API}$ ) at eutectic points. The linear regression generated  $x_{API} = -0.2832 I_c + 0.5621$  ( $R^2 = 0.9429$ ).
